# Supplementary material for: Overexpression of DoUGP Enhanced Biomass and Stress Tolerance by Promoting Polysaccharide Accumulation in Dendrobium officinale
Source: Front Plant Sci. 2020 Nov 16;11:533767. doi: 10.3389/fpls.2020.533767 (PMC7703667; doi:10.3389/fpls.2020.533767)
Supplement: Supplementary file 1 [file Table_1.XLSX]

## Sheet: table S1
	Table S1. Monosaccharide composition of water-soluble polysaccharides in stems of D. officinale (mg/kg DW).
	name of monosaccharide	content of WT(mg/kg)	content of OE(mg/kg)
	mannose	119690.83±537.93	128015.39±402.04**
	ribose	21.66±1.22	19.078±0.75*
	rhamnose	291.14±10.62	170.76±6.41**
	glucuronic acid	276.97±3.41	174.79±4.63**
	galacturonic acid	3203.71±95.50	1912.73±3.38**
	glucose	18099.40±347.02	13604.94±73.20**
	galactose	2545.04±34.56	1823.99±42.20**
	xylose	177.24±2.29	149.37±12.45*
	arabinose	1118.86±66.11	789.57±13.20**
	fucose	29.0138±2.50	37.04±0.50**
	All experiments consist of three independent replicates. DW, dry weight. Asterisks indicate the statistically significant differences (Student’s t-test, * p < 0.05, ** p < 0.01).
