# Supplementary material for: Overexpression of DoUGP Enhanced Biomass and Stress Tolerance by Promoting Polysaccharide Accumulation in Dendrobium officinale
Source: Front Plant Sci. 2020 Nov 16;11:533767. doi: 10.3389/fpls.2020.533767 (PMC7703667; doi:10.3389/fpls.2020.533767)
Supplement: Supplementary file 2 [file Table_2.XLSX]

## Sheet: Sheet1
Table S2. Primer and gene sequence
Primer name	sequence
DoUGP-AscI-F	GTACGGCGCGCCATGGCGGCCGTCGCC
DoUGP-SpeI-R	GTACACTAGTTTAGATATCCTCAGAGCTCTTGATCTCC
DoUGP-5’UTR-F	TCAGTTTATCTTCGCCTCCA
DoUGP-3’UTR-R	CTGCCATTGGAAAACTCCAT
D1-qRT-F	TGTTCAGAAGGAGAAGGCCG
D1-qRT-R	TGCCAGAATCACCACAAGCT
D2-qRT-F	GCTGCTCAGGAGGCCATAAT
D2-qRT-R	CTCCCATCGACCAGCTCTTC
D3-qRT-F	GCCTTTCTGTGCATTACCGTC
D3-qRT-R	CCCCGCGATCATTTAGTCCT
D4-qRT-F	GTGGTTTCATCGGATGCAGC
D4-qRT-R	TGGAACCCTCTCTCTGTCCT
U1-qRT-F	AATTGTGTTTGCGAGAGGGC
U1-qRT-R	TGCAGTGCCAACAACATCAC
U2-qRT-F	GGAGGCTGCACAGATCATCA
U2-qRT-R	GTCCGTGATAGACTCTGGCG
GAPDH-qRT-F	CAAGGACTGGAGAGGTGGAAGA
GAPDH-qRT-F	GACCTGCTGTCACCCAAGAAGT
DoCSLA1-qRT-F	AACGGTACTGCTGGTGTTT
DoCSLA1-qRT-R	GCTCTGACTGCTAGATCCATATC
DoCSLA2-qRT-F	GCGTCTTATGACATCGCCTATC
DoCSLA2-qRT-R	CAAGTTTCCAACGAACCCAAAG
DoCSLA3-qRT-F	TTCAACCGACCCGGAAATTA
DoCSLA3-qRT-R	CTGTTGTCTCTGACCTCGTATG
DoCSLA4-qRT-F	TGGAACGCCAAGCTCTATTC
DoCSLA4-qRT-R	CGCCCTTCCAGTTTCACATA
DoCSLA5-qRT-F	GCCAAGCTCTTTCCACCTAA
DoCSLA5-qRT-R	CCTCCAGAAGACCAATGAAGAC
DoCSLA6-qRT-F	GATGTCCCTGGATTACCACTTC
DoCSLA6-qRT-R	TTCCAACCTCCTGCTTCATTTA
DoCSLA7-qRT-F	TCATCAACCTTCGCCTTCTTT
DoCSLA7-qRT-R	CTCCACAGTAGTTCGGTCTTTC
DoCSLA8-qRT-F	CTGGAGGATGGAAGGATAGGA
DoCSLA8-qRT-R	ACCTTGACATCACCAACATACA
